# Supplementary material
Source: MDPI journal article supplement (https://www.mdpi.com/2313-0105/8/10/182)
Supplement: s1 [file s1 › batteries-1882044-supplementary.pdf]

*Supplementary material for*

## **Fabrication of TiFe-Based Electrodes Using High-Energy Ball Mill with Mn Additive for NiMH Batteries**

Amir Zali <sup>1</sup>, Seyed Farshid Kashani-Bozorg <sup>1,\*</sup>, Zahra Lalegani <sup>1</sup> and Bejan Hamawandi <sup>2,\*</sup>

<sup>1</sup> School of Metallurgy and Materials Engineering, College of Engineering, University of Tehran, Tehran 11155-4563, Iran

<sup>2</sup> Department of Applied Physics, KTH Royal Institute of Technology, SE-106 91 Stockholm, Sweden

\* Correspondence: fkashani@ut.ac.ir (S.F.K.-B.); bejan@kth.se (B.H.)

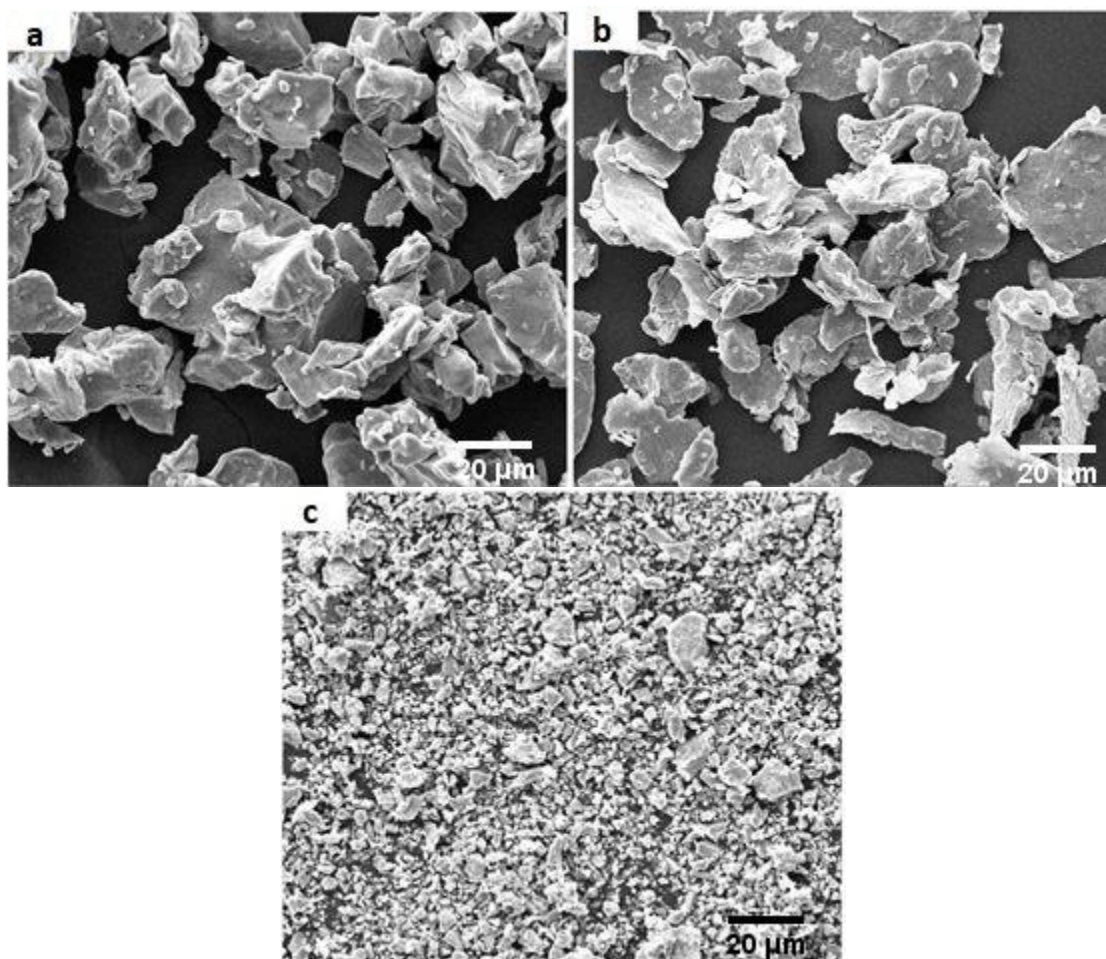

Figure S1. SEM images of raw materials before HEBM: a) Ti, b) Fe, and c) Mn.

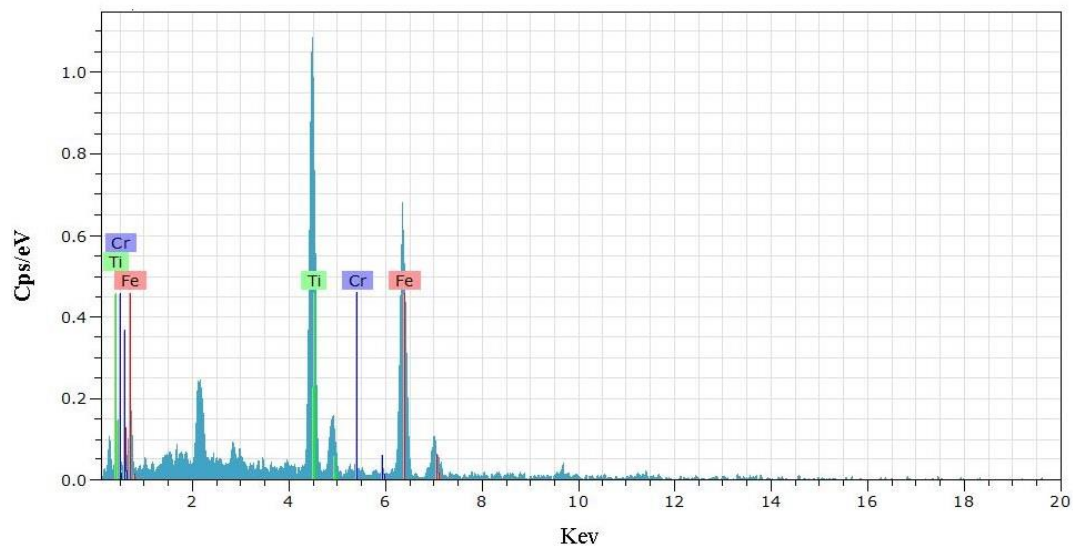

Figure S2. EDS analysis of TiFe intermetallic compound after 60 h of milling.

Table S1. Atomic and weight percentages of the elements in TiFe milled product after 60 h of milling.

| Element | Weight percent (%) | Atomic percent (%) |
|---------|--------------------|--------------------|
| Ti      | 49.7               | 46.3               |
| Fe      | 50.2               | 53.6               |
| Cr      | 0.1                | 0.1                |
| Total   | 100                | 100                |

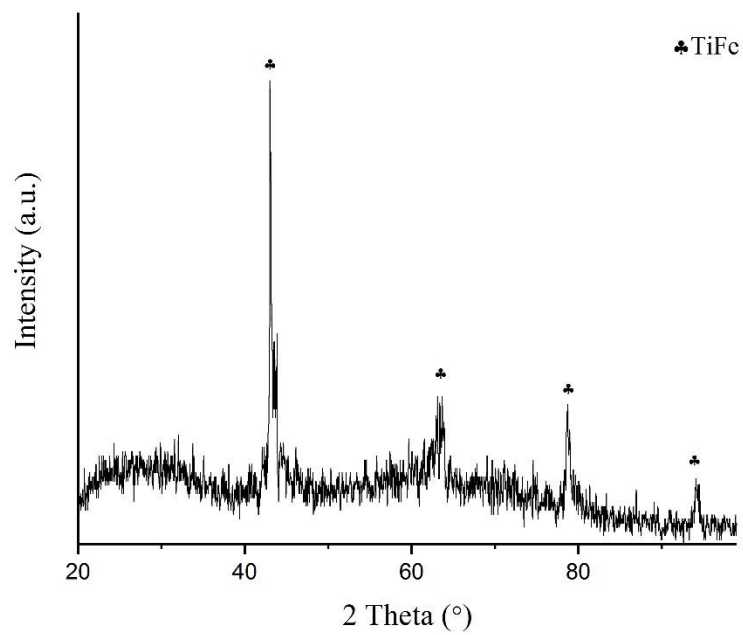

Figure S3. XRD pattern of the heat treated milled product exhibiting sharp peaks of TiFe intermetallic compound crystals.
